# Supplementary material for: Phage Cocktail Development against Aeromonas salmonicida subsp. salmonicida Strains Is Compromised by a Prophage
Source: MDPI journal article supplement (doi:10.3390/v13112241), 2021-11-08
Supplement: s1 [file s1]

Supplementary data

# Phage Cocktail Development Against *Aeromonas salmonicida* subsp. *salmonicida* Strains is Compromised by a Prophage

Nava Hosseini <sup>1,2,3</sup>, Valérie E. Paquet <sup>1,2,3</sup>, Mahdi Chehreghani <sup>4</sup>, Sylvain Moineau <sup>1,2,5,6</sup> and Steve J. Charette <sup>1,2,3,\*</sup>

- <sup>1</sup> Institut de Biologie Intégrative et des Systèmes (IBIS), Pavillon Charles-Eugène-Marchand, Université Laval, Quebec City, QC G1V 0A6, Canada; nava.hosseini.1@ulaval.ca (N.H.); Valerie.Paquet@criucpq.ulaval.ca (V.E.P.); Sylvain.Moineau@bcm.ulaval.ca (S.M.)
- <sup>2</sup> Département de Biochimie, de Microbiologie et de Bio-Informatique, Faculté des Sciences et de Génie, Université Laval, Quebec City, QC G1V 0A6, Canada
- <sup>3</sup> Centre de Recherche de l'Institut Universitaire de Cardiologie et de Pneumologie de Québec (IUCPQ), Quebec City, QC G1V 4G5, Canada
- <sup>4</sup> Department of Mechanical Engineering, McGill University, Montreal, QC H3A 0C3, Canada; mahdi.chehreghani@mail.mcgill.ca
- <sup>5</sup> Groupe de Recherche en Écologie Buccale (GREB), Faculté de Médecine Dentaire, Université Laval, Quebec City, QC G1V 0A6, Canada
- <sup>6</sup> Félix d'Hérelle Reference Center for Bacterial Viruses, Faculté de Médecine Dentaire, Université Laval, Quebec City, QC G1V 0A6, Canada
- \* Correspondence: steve.charette@bcm.ulaval.ca

**Table S1.** Phage cocktails used in this study.

| Identification of phage cocktails | Combination of virulent phages          | Proportion (%) |
|-----------------------------------|-----------------------------------------|----------------|
| A                                 | HER98 + HER110                          | 50–50          |
| B                                 | HER98 + SW69-9                          | 50–50          |
| C                                 | HER98 + RIV-10                          | 50–50          |
| D                                 | HER98 + L9-6                            | 50–50          |
| E                                 | HER110 + SW69-9                         | 50–50          |
| F                                 | HER110 + RIV-10                         | 50–50          |
| G                                 | HER110 + L9-6                           | 50–50          |
| H                                 | SW69-9 + RIV-10                         | 50–50          |
| I                                 | SW69-9 + L9-6                           | 50–50          |
| J                                 | RIV-10 + L9-6                           | 50–50          |
| K                                 | HER98 + HER110 + SW69-9                 | 33–33–33       |
| L                                 | HER98 + HER110 + RIV-10                 | 33–33–33       |
| M                                 | HER98 + HER110 + L9-6                   | 33–33–33       |
| N                                 | HER98 + SW69-9 + RIV-10                 | 33–33–33       |
| O                                 | HER98 + SW69-9 + L9-6                   | 33–33–33       |
| P                                 | HER98 + RIV-10 + L9-6                   | 33–33–33       |
| Q                                 | HER110 + SW69-9 + RIV-10                | 33–33–33       |
| R                                 | HER110 + SW69-9 + LP9-6                 | 33–33–33       |
| S                                 | SW69-9 + RIV-10 + L9-6                  | 33–33–33       |
| T                                 | HER98 + HER110 + SW69-9 + RIV-10        | 25–25–25–25    |
| U                                 | HER98 + HER110 + SW69-9 + L9-6          | 25–25–25–25    |
| V                                 | HER98 + SW69-9 + RIV-10 + L9-6          | 25–25–25–25    |
| W                                 | HER110 + SW69-9 + RIV-10 + L9-6         | 25–25–25–25    |
| X                                 | HER98 + HER110 + SW69-9 + RIV-10 + L9-6 | 20–20–20–20–20 |

**Table S2.** Local virulence index for various phage combinations against *Aeromonas salmonicida* subsp. *salmonicida* strain 01-B526. The highest value is indicated in blue.

| Phage cocktail     | vi_MOI 0.1  | vi_MOI 1    | vi_MOI 10   |
|--------------------|-------------|-------------|-------------|
| HER98 [44RR2.8t.2] | 0.046044454 | 0.186651001 | 0.218289561 |
| HER110 [65.2]      | 0.199182396 | 0.189452846 | 0.185404235 |
| SW69-9             | 0.277307759 | 0.37496482  | 0.408130133 |
| Riv-10             | 0.16298522  | 0.385106676 | 0.398548002 |
| L9-6               | 0.301305524 | 0.364086701 | 0.528888694 |
| A                  | 0.322921671 | 0.538446462 | 0.243112231 |
| B                  | 0.255301344 | 0.223085183 | 0.350845633 |
| C                  | 0.155787975 | 0.199480607 | 0.378664711 |
| D                  | 0.312894356 | 0.336540973 | 0.618233469 |
| E                  | 0.677996348 | 0.5522271   | 0.504084348 |
| F                  | 0.633118652 | 0.569655485 | 0.610741481 |
| G                  | 0.657725414 | 0.506799038 | 0.62548578  |
| H                  | 0.465167133 | 0.239655633 | 0.443879947 |
| I                  | 0.517659676 | 0.300406537 | 0.575425561 |
| J                  | 0.518535142 | 0.296989504 | 0.445726203 |
| K                  | 0.670512383 | 0.62578379  | 0.496826045 |
| L                  | 0.639308411 | 0.685903562 | 0.493491761 |
| M                  | 0.633062893 | 0.494415756 | 0.52940613  |
| N                  | 0.321471574 | 0.180811498 | 0.329640898 |
| O                  | 0.329127671 | 0.317298372 | 0.358358222 |
| P                  | 0.279562852 | 0.389207927 | 0.437787149 |
| Q                  | 0.686963291 | 0.685108518 | 0.58524618  |
| R                  | 0.640020707 | 0.466719635 | 0.526446416 |
| S                  | 0.278722943 | 0.546341345 | 0.503507984 |
| T                  | 0.628657638 | 0.755075302 | 0.483464445 |
| U                  | 0.567288228 | 0.740415831 | 0.458657078 |
| V                  | 0.274923864 | 0.518826269 | 0.479194182 |
| W                  | 0.619498904 | 0.694638949 | 0.619035693 |
| X                  | 0.578853834 | 0.704268718 | 0.513593931 |

**Table S3.** Local virulence index for cocktail T against various *A. salmonicida* subsp. *salmonicida* strains with different genetic backgrounds.

| Strain types                                                                                            | vi_MOI 0.1  | vi_MOI 1    | vi_MOI 10   |
|---------------------------------------------------------------------------------------------------------|-------------|-------------|-------------|
| <b>Cocktail T, local virulence index against European strains, without <i>AsaGEI</i> and Prophage 3</b> |             |             |             |
| A449                                                                                                    | 0.336424818 | 0.40274039  | 0.488505662 |
| JF379                                                                                                   | 0.448689918 | 0.282736617 | 0.410928338 |
| <b>Cocktail T, local virulence index against Quebec strains, without <i>AsaGEI</i> and Prophage 3</b>   |             |             |             |
| SHY13-2317                                                                                              | 0.717108707 | 0.733791365 | 0.745477031 |
| SHY15-2816                                                                                              | 0.749678939 | 0.72496142  | 0.757712432 |
| <b>Cocktail T, local virulence index against Quebec strains, with <i>AsaGEI1a</i></b>                   |             |             |             |
| 01-B526                                                                                                 | 0.628657638 | 0.755075302 | 0.483464445 |
| M15879-11                                                                                               | 0.624797154 | 0.612398984 | 0.396309815 |
| SHY16-3432                                                                                              | 0.603905802 | 0.635290645 | 0.424066315 |
| SHY18-3759                                                                                              | 0.601946397 | 0.663228334 | 0.385872447 |
| <b>Cocktail T, local virulence index against Quebec strains, with <i>AsaGEI2a</i></b>                   |             |             |             |
| 07-7346                                                                                                 | 0.701869888 | 0.786060585 | 0.766785491 |
| 09-0167                                                                                                 | 0.593843682 | 0.626626347 | 0.709431381 |
| <b>Cocktail T, local virulence index against Quebec strains, with <i>AsaGEI2a</i> and Prophage 3</b>    |             |             |             |
| 01-B516                                                                                                 | 0.396935099 | 0.463445471 | 0.594729104 |
| 2004-05MF26                                                                                             | 0.336003899 | 0.436750735 | 0.48265839  |
| M22710-11                                                                                               | 0.27512771  | 0.318053256 | 0.461495858 |

**Table S4.** Local virulence index for cocktail T against different *A. salmonicida* subsp. *salmonicida* strains with or without Prophage 3.

| Strain types         | vi_MOI 0.1  | vi_MOI 1    | vi_MOI 10   |
|----------------------|-------------|-------------|-------------|
| A449 (-Pro3)         | 0.494013072 | 0.406029264 | 0.494013072 |
| A449-2 (+Pro3)       | 0.10437813  | 0.242622392 | 0.486418874 |
| A449-6 (+Pro3)       | 0.150866628 | 0.224389906 | 0.377181179 |
| SHY13-2317 (-Pro3)   | 0.720299269 | 0.738424194 | 0.749839586 |
| SHY13-2317-1 (+Pro3) | 0.183734639 | 0.392304956 | 0.538994321 |
| SHY13-2317-4 (+Pro3) | 0.178533094 | 0.320080035 | 0.575236751 |
| 01-B526 (-Pro3)      | 0.632215908 | 0.755345052 | 0.490093747 |
| 01-B526-9 (+Pro3)    | 0.151169151 | 0.14899264  | 0.367778442 |
| 01-B526-26 (+Pro3)   | 0.102226017 | 0.102393423 | 0.329766714 |
| 01-B526-28 (+Pro3)   | 0.148080043 | 0.115742069 | 0.317723029 |
| M15879-11 (-Pro3)    | 0.629882183 | 0.618436844 | 0.402461793 |
| M15879-11-7 (+Pro3)  | 0.17513866  | 0.177666145 | 0.30819099  |
| M15879-11-24 (+Pro3) | 0.189023558 | 0.225972272 | 0.304579525 |
| 09-0167 (-Pro3)      | 0.598024326 | 0.634030166 | 0.717258134 |
| 09-0167-4 (+Pro3)    | 0.146702951 | 0.325207204 | 0.567615586 |
| 09-0167-9 (+Pro3)    | 0.223901283 | 0.312552123 | 0.513292927 |

**Table S5.** Sensitivity of *A. salmonicida* subsp. *salmonicida* strains harboring various genetic elements to five individual phages using the spot test assay.

| Strain                                      | Phages                |                       |                       |                       |                       |
|---------------------------------------------|-----------------------|-----------------------|-----------------------|-----------------------|-----------------------|
|                                             | HER98                 | HER110                | SW69-9                | RIV-10                | L9-6                  |
| M15879-11 ( <i>AsaGEI1a</i> )               | $10^{-4}$ - $10^{-7}$ | $10^{-1}$ - $10^{-3}$ | $10^{-4}$ - $10^{-7}$ | $10^{-4}$ - $10^{-7}$ | $10^{-4}$ - $10^{-7}$ |
| SHY13-2317 (no <i>AsaGEI</i> or Prophage 3) | $10^{-4}$ - $10^{-7}$ | $10^{-1}$ - $10^{-3}$ | $10^{-4}$ - $10^{-7}$ | $10^{-4}$ - $10^{-7}$ | $10^{-4}$ - $10^{-7}$ |
| 01-B516 ( <i>AsaGEI2a</i> + Prophage 3)     | $10^{-4}$ - $10^{-7}$ | $10^{-1}$ - $10^{-3}$ | $10^{-4}$ - $10^{-7}$ | $10^{-4}$ - $10^{-7}$ | $10^{-1}$ - $10^{-3}$ |

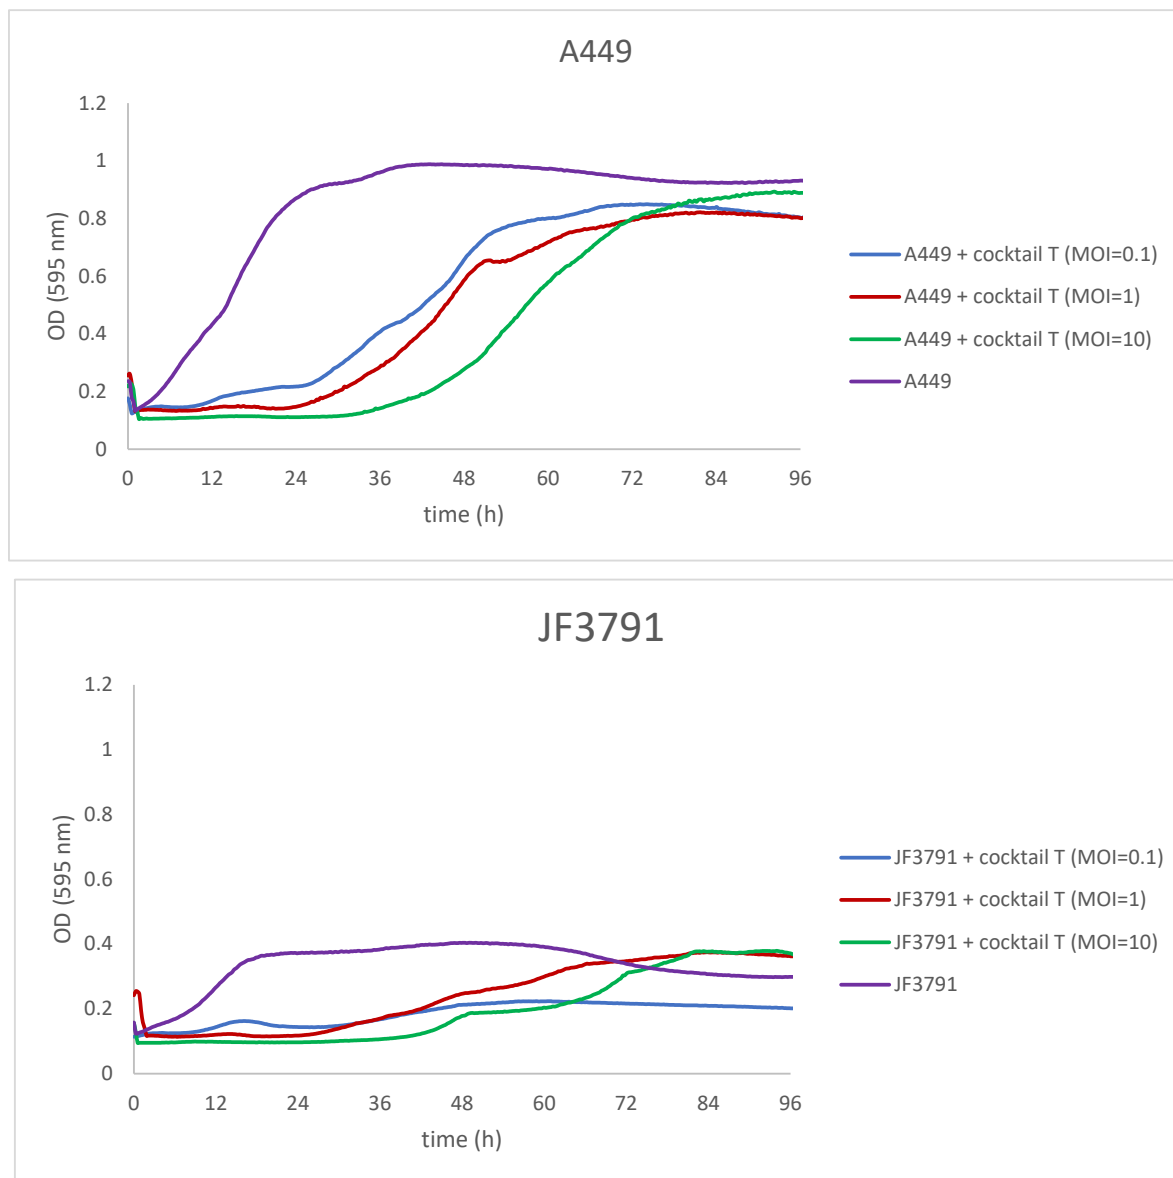

**Figure S1.** Growth curves for the European *A. salmonicida* subsp. *salmonicida* strains A449 and JF3791 in presence of the phage cocktail T (at MOIs 0.1, 1 or 10) compared to the growth of the bacterial strains without phages. The curves are the average of three biological replicates.
